# Supplementary material for: Technical note: Assessing gas equilibration systems for continuous p CO 2 measurements in inland waters
Source: Copernicus journal article supplement (doi:10.5194/bg-13-3915-2016), 2016-07-07
Supplement: Supplementary file 1 [file bg-13-3915-2016-supplement.pdf]

Supplement of Biogeosciences, 13, 3915–3930, 2016  
<http://www.biogeosciences.net/13/3915/2016/>  
doi:10.5194/bg-13-3915-2016-supplement  
© Author(s) 2016. CC Attribution 3.0 License.

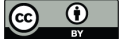

*Supplement of*

## **Technical note: Assessing gas equilibration systems for continuous $p\text{CO}_2$ measurements in inland waters**

**Tae Kyung Yoon et al.**

*Correspondence to:* Ji-Hyung Park (jhp@ewha.ac.kr)

The copyright of individual parts of the supplement might differ from the CC-BY 3.0 licence.

## Contents

Table S1. List of components of the tested equilibration systems.

Figure S2. Pictures showing three tested equilibration systems.

Figure S2. Biofouling on the membrane surface following a 2-week underwater deployment in (a) a eutrophic tidal river reach and (b) oligotrophic reservoir surface water.

Figure S3. Continuous  $p\text{CO}_2$  measurements at an oligotrophic reservoir surface water of the Han River using a membrane-enclosed sensor (a) and the relationship between pH and  $p\text{CO}_2$  during successive monitoring periods from deployment (b).

**Table S1.** List of components of the tested equilibration systems.

|                                                  | Spray-type equilibrator                                                                                                                                                                        | Marble-type equilibrator                             | Membrane-enclosed sensor                                                                                                                                 |
|--------------------------------------------------|------------------------------------------------------------------------------------------------------------------------------------------------------------------------------------------------|------------------------------------------------------|----------------------------------------------------------------------------------------------------------------------------------------------------------|
| Medium of equilibration                          | Spray nozzle<br>(GG 3/8 - SS 15, Spraying System Co., USA)                                                                                                                                     | Marble<br>( $\emptyset$ 10 mm)                       | PTFE membrane<br>(200-07, International Polymer Engineering, USA)<br>Rubberizing compound; Plasti Dip (Plasti Dip International, USA)                    |
| Equilibration Chamber                            | Acrylic tube<br>( $\emptyset$ 48 mm $\times$ 200 mm)                                                                                                                                           | Acrylic tube<br>( $\emptyset$ 48 mm $\times$ 300 mm) | –                                                                                                                                                        |
| Detector                                         | IRGA; LI820 (LI-COR, USA)                                                                                                                                                                      |                                                      | Diffusion-type IRGA; GMP222 (sensor probe) + GMT222 (sensor transmitter) (Vaisala, Finland)                                                              |
| Logger                                           | Laptop                                                                                                                                                                                         |                                                      | CR10X or CR1000 (Campbell Scientific Inc., USA)                                                                                                          |
| Water flow                                       | Bilge pump; Tsunami T800 (Attwood Co., USA)                                                                                                                                                    |                                                      | –                                                                                                                                                        |
| Air flow                                         | Diaphragm pump (NMP 830 KNDC, KNF Neuberger Ltd., Germany)<br>Desiccant; Drierite (W.A. Hammond Drierite Co. Ltd., USA)<br>Air filter; Balston 25 micron air filter (Parker Hannifin Co., USA) |                                                      | –                                                                                                                                                        |
| Power                                            | 12 V DC                                                                                                                                                                                        |                                                      | 24 V DC<br>(2 $\times$ 12 V in series)                                                                                                                   |
| Barometric pressure and temperature compensation | Internal compensation function supported by LI820                                                                                                                                              |                                                      | Barometric pressure: Watchdog 1650 Micro Station (Spectrum Technologies Inc., USA),<br>Water temperature: Orion 5-Star Portable (Thermo Scientific, USA) |

### (a) Spray- and marble-type equilibrators

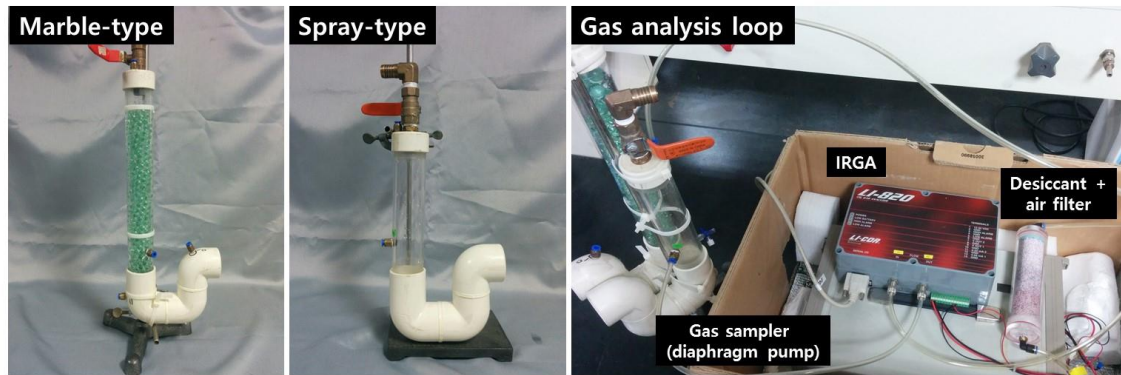

### (b) Membrane-enclosed sensor

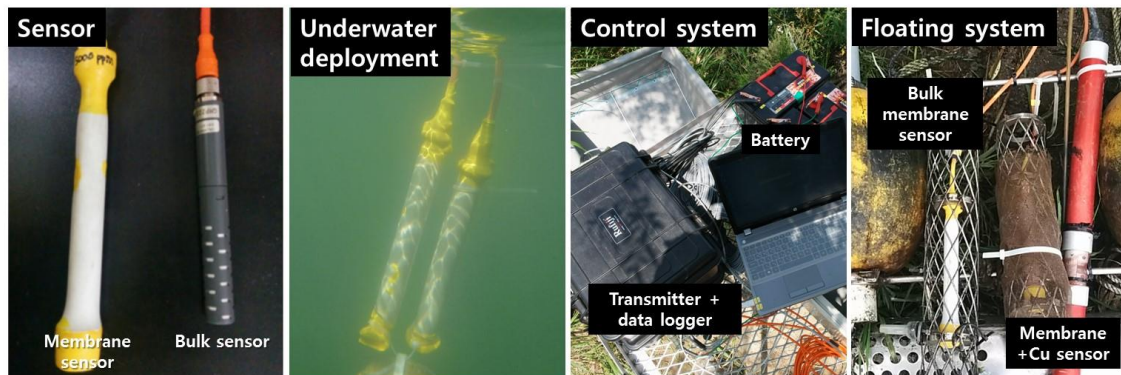

Figure S2. Pictures showing three tested equilibration systems. The system components are listed in Table S1.

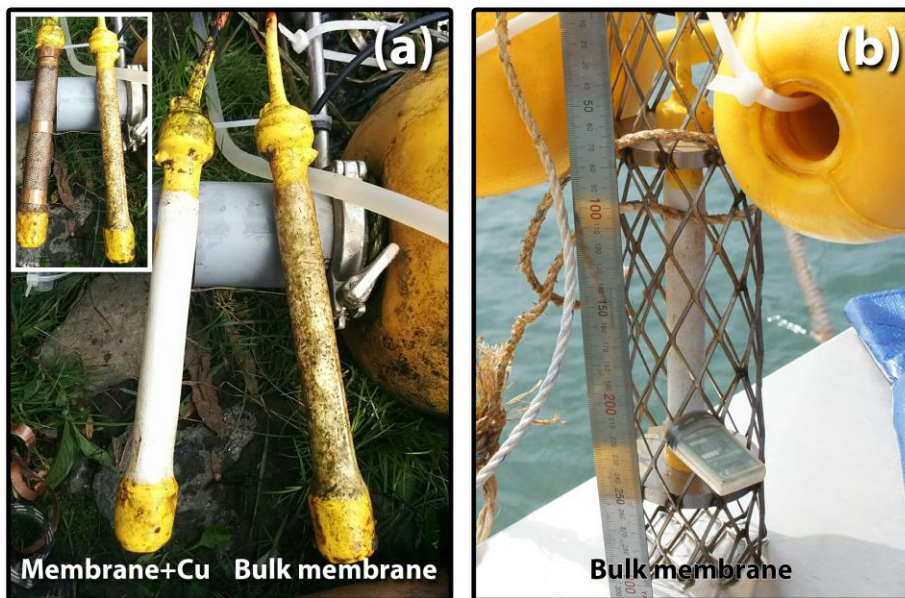

**Eutrophic upper estuarine reach  
(Bamseom Island, DOY 195)**

**Oligotrophic reservoir  
(Lake Soyang, DOY 172)**

30 **Figure S2.** Biofouling on the membrane surface following a 2-week underwater deployment in (a) a eutrophic tidal river reach and (b) oligotrophic reservoir surface water. Antifouling with copper-mesh screening (“membrane+Cu”) reduced the biofouling on the Cu-protected membrane surface in the eutrophic tidal reach. The unprotected membrane sensor (“bulk membrane”) did not show noticeable biofouling in the oligotrophic reservoir.

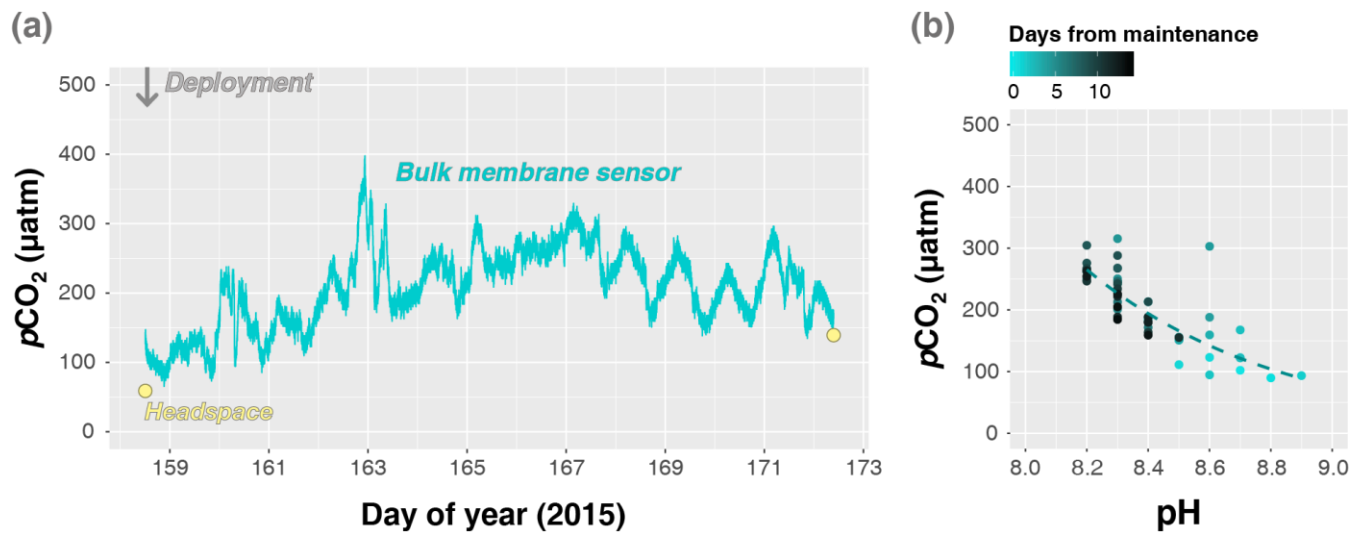

35 **Figure S3.** Continuous  $p\text{CO}_2$  measurements at an oligotrophic reservoir surface water of the Han River using a membrane-enclosed sensor (a) and the relationship between pH and  $p\text{CO}_2$  during successive monitoring periods from deployment (b).
